# Supplementary material for: Conserved sequence motifs in the abiotic stress response protein late embryogenesis abundant 3
Source: PubMed Central journal article supplement (PMC7410210; doi:10.1371/journal.pone.0237177), 2020-08-06
Supplement: pone.0237177.s001.pdf [file pone.0237177.s001.pdf]

Fig. S1

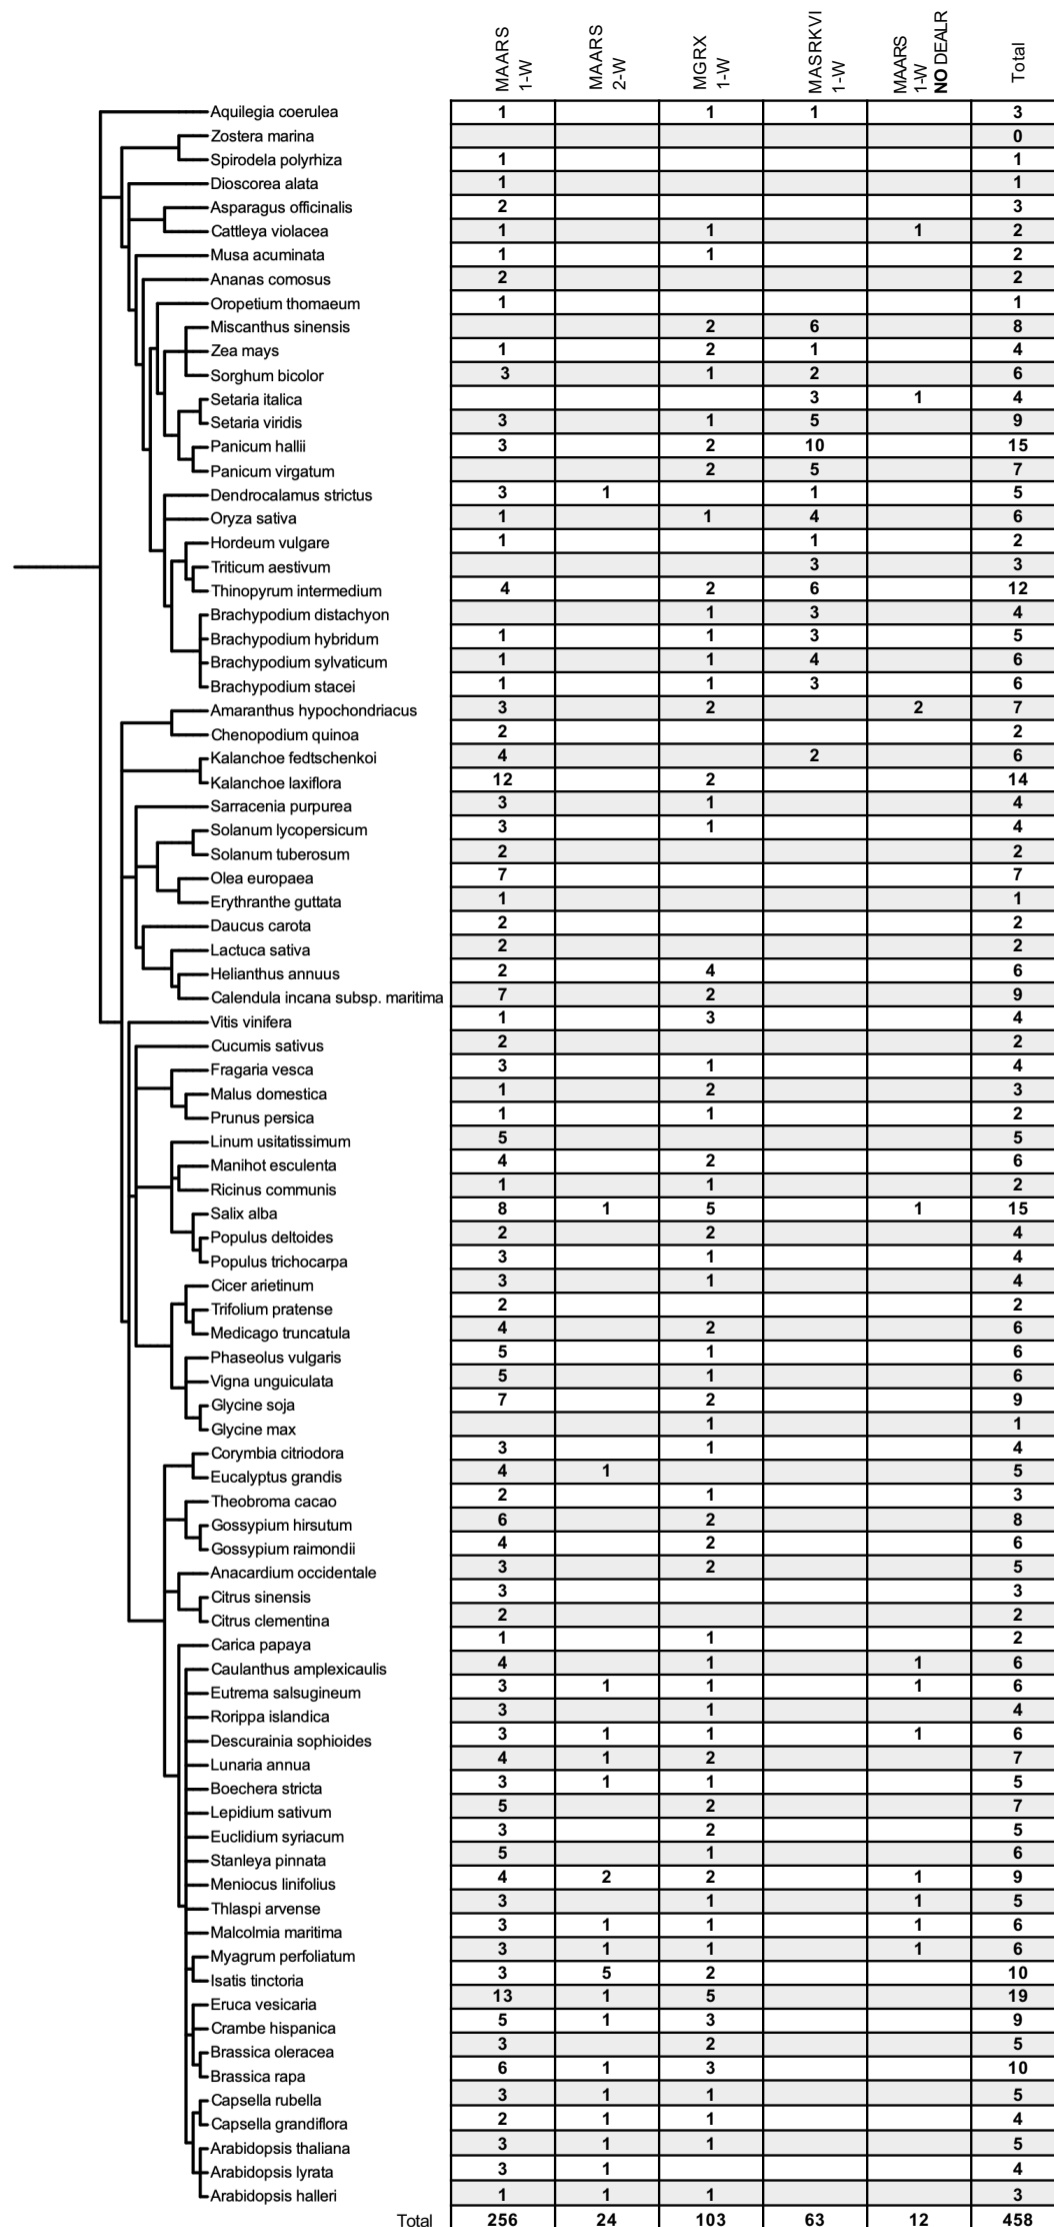

**Figure S1. LEA3 Proteins in Higher plants by species.** A plant species tree was generated using PhyloT and NCBI genomic reference numbers as described in the Materials and Methods. The five architectures for each LEA3 protein are listed. The total for each species listed in the right-hand column, and the total of each architecture are listed in the bottom row.
